# Supplementary material for: Die stillende Frau in der Öffentlichkeit: Ein Politikum
Source: Springer Nature journal article supplement (doi:10.1007/s43877-023-0796-z), 2023-07-01
Supplement: MOESM1 [file 25596902]

## Literatur

### zum Beitrag „Die stillende Frau in der Öffentlichkeit: Ein Politikum“

von Joachim Graf, Kristie Walter, Harald Abele

HebammenWissen (4) 4/2023, S. 46–49

Abdulwadud OA, Snow ME. Interventions in the workplace to support breastfeeding for women in employment. *Cochrane Database Syst Rev.* 2012;10(10):CD006177. doi: 10.1002/14651858.CD006177.pub3. PMID: 23076920; PMCID: PMC7388861.

AWMF. Deutsch-Österreichische Leitlinie zur HIV-Therapie in der Schwangerschaft und bei HIV-exponierten Neugeborenen. AWMF-Register-Nr.: 055 – 002. S2k-Leitlinie. Stand: 2020. URL: [https://register.awmf.org/assets/guidelines/055-002l\\_S2k\\_HIV-Therapie-Schwangerschaft-und-HIV-exponierten\\_Neugeborenen\\_2020-10\\_01.pdf](https://register.awmf.org/assets/guidelines/055-002l_S2k_HIV-Therapie-Schwangerschaft-und-HIV-exponierten_Neugeborenen_2020-10_01.pdf) (Zugriff: 10.05.2023).

Azuine RE, Murray J, Alsafi N, Singh GK. Exclusive Breastfeeding and Under-Five Mortality, 2006-2014: A Cross-National Analysis of 57 Low- and-Middle Income Countries. *Int J MCH AIDS.* 2015;4(1):13-21. doi:10.21106/ijma.52

Bode L. Human Milk Oligosaccharides in the Prevention of Necrotizing Enterocolitis: A Journey From in vitro and in vivo Models to Mother-Infant Cohort Studies. *Front. Pediatr.* 2018;6:385. doi: 10.3389/fped.2018.00385

Boyle MD, Kavi LK, Louis LM, et al. Occupational Exposures to Phthalates among Black and Latina U.S. Hairdressers Serving an Ethnically Diverse Clientele: A Pilot Study. *Environ Sci Technol.* 2021;55(12):8128-8138. doi:10.1021/acs.est.1c00427

Brettschneider AK, von der Lippe E, Lange C. Stillverhalten in Deutschland – Neues aus KiGGs Welle 2. *Bundesgesundheitsbl* 2018;61:920–925. <https://doi.org/10.1007/s00103-018-2770-7>

Brown A. Soziologische und kulturelle Einflüsse auf das Stillen. In: *Stillen und Muttermilch - Von den biochemischen Grundlagen bis zur gesellschaftlichen Bedeutung.* The Global Health Network 2018. <https://doi.org/10.21428/3d48c34a.9cae00b0>

Brucker SY, Simoes E. Frauengesundheit. In: Brucker SY, Doubek K, Scharl A, Simoes E, Wallwiener D (Hrsg.). *Frauengesundheit – Frauenmedizin.* Fachübergreifend und kompakt. München: Elsevier Verlag 2023, S. 1-18.

Bundesanstalt für Landwirtschaft und Ernährung. So wird Deutschland stillfreundlich! Ergebnisse und Empfehlungen aus dem internationalen Forschungsvorhaben Becoming Breastfeeding Friendly. Bonn 2019. URL: [https://www.gesund-ins-leben.de/fileadmin/resources/import/pdf/bbf\\_faktenblatt\\_ergebnisse.pdf](https://www.gesund-ins-leben.de/fileadmin/resources/import/pdf/bbf_faktenblatt_ergebnisse.pdf) (Zugriff: 09.05.2023).

Camacho-Morales A, Caba M, García-Juárez M, Caba-Flores MD, Viveros-Contreras R, Martínez-Valenzuela C. Breastfeeding Contributes to Physiological Immune Programming in the Newborn. *Front Pediatr.* 2021;9:744104. doi:10.3389/fped.2021.744104

Collaborative Group on Hormonal Factors in Breast Cancer. Breast cancer and breastfeeding: collaborative reanalysis of individual data from 47 epidemiological studies in 30 countries, including 50302 women with breast cancer and 96973 women without the disease. *Lancet.* 2002;360(9328):187-195. doi:10.1016/S0140-6736(02)09454-0

Dagla M, Mrvoljak-Theodoropoulou I, Vogiatzoglou M, et al. Association between Breastfeeding Duration and Long-Term Midwifery-Led Support and Psychosocial Support: Outcomes from a Greek Non-Randomized Controlled Perinatal Health Intervention. *Int J Environ Res Public Health.* 2021;18(4):1988. doi:10.3390/ijerph18041988

Edelmann S. Die Macht, das Subjekt und das Sexualdispositiv. In: *Deutsches Institut für Jugend und Gesellschaft (Hrsg.). Bulletin 26 - 2021 Sexualethik(en) im Umbruch.* URL:

<https://www.dijg.de/bulletin/bulletin26-sexualethik-apologetik/foucault-diskurs-sexualdispositiv-edelmann/> (Zugriff: 10.05.2023).

EFSA Panel on Dietetic Products NaA. Scientific opinion on the appropriate age for introduction of complementary feeding of infants. *EFSA J* 2009;7:1423.

Ernährungskommission der Deutschen Gesellschaft für Kinder- und Jugendmedizin, Bühner C, Genzel-Boroviczeny O et al. Ernährung gesunder Säuglinge. Empfehlungen der Ernährungskommission der Deutschen Gesellschaft für Kinder- und Jugendmedizin. *Monatschr Kinderheilkd* 2014;162:527-38.

Evers M. Von oben ohne bis Burkini: Grenoble erlaubt jede Form von Bademode. *Tagesspiegel* 17.05.2022. URL: <https://www.tagesspiegel.de/gesellschaft/panorama/grenoble-erlaubt-jede-form-von-bademode-4793152.html> (Zugriff: 10.05.2023).

Gildemeister R, Hericks K. Die Idee der „Geschlechtsrollen“. In: Dies. *Geschlechtersoziologie Theoretische Zugänge zu einer vertrackten Kategorie des Sozialen*. München: Oldenbourg Wissenschaftsverlag GmbH 2012, S. 109-148.

Graf J, Abele H, Boer B. Brustkrebs in der Schwangerschaft. Interdisziplinäre Versorgung komplexer Verläufe. *HebammenWissen* 2022; 3(4): 50-53. Doi: 10.1007/s43877-022-0716-7

Graf J, Abele H. Mann und Frau schmerzt es unterschiedlich. Implikationen der Gendermedizin (Teil 1). *Pflegez* 2023a; 76(4): 40-41. <https://doi.org/10.1007/s41906-023-2031-8>

Graf J, Abele H. Klima, Krise, Konzeption: Der ganzheitliche Blick. *Planetary Health in der Hebammenversorgung*. *HebammenWissen* 2023b; 4(2):46-49. <https://doi.org/10.1007/s43877-023-0755-8>

Graus TM, Brandstetter S, Seelbach-Göbel B, et al. Breastfeeding behavior is not associated with health literacy: evidence from the German KUNO-Kids birth cohort study. *Arch Gynecol Obstet*. 2021;304(5):1161-1168. doi:10.1007/s00404-021-06038-2

Henderson NB, Sears CG, Calafat A, Chen A, Lanphear B, Romano M, Yolton K, Braun JM. Associations of Breast Milk Consumption with Urinary Phthalate and Phenol Exposure Biomarkers in Infants. *Environ. Sci. Technol. Lett.* 2020;7(10):733-739. <https://doi.org/10.1021/acs.estlett.0c00450>

Hieber L. Modesoziologie. In: Moebius S, Nungesser F, Scherke K (Hrsg.). *Handbuch Kultursoziologie*. Band 2: Theorien – Methoden – Felder. Wiesbaden: Springer VS 2018. [https://doi.org/10.1007/978-3-658-08001-3\\_36-1](https://doi.org/10.1007/978-3-658-08001-3_36-1)

Jahreis S, Trump S, Bauer M, et al. Maternal phthalate exposure promotes allergic airway inflammation over 2 generations through epigenetic modifications. *J Allergy Clin Immunol*. 2018;141(2):741-753. doi:10.1016/j.jaci.2017.03.017

Jungkind M. Thread: Mutter sein ist hochpolitisch. *Twitterperlen* 18.05.2021. URL: <https://www.twitterperlen.de/thread-mutter-sein-ist-hochpolitisch/> (Zugriff: 09.05.2023).

Lee H, Park H, Ha E, et al. Effect of Breastfeeding Duration on Cognitive Development in Infants: 3-Year Follow-up Study. *J Korean Med Sci*. 2016;31(4):579-584. doi:10.3346/jkms.2016.31.4.579

Morrison AH, Andersen J. Mothers' Reasons for Early Breastfeeding Cessation. *MCN, The American Journal of Maternal/Child Nursing* 2019;44(6): 325-330.

Jordan S, Hoebel J. Gesundheitskompetenz von Erwachsenen in Deutschland. Ergebnisse der Studie „Gesundheit in Deutschland aktuell“ (GEDA). *Bundesgesundheitsbl* 2015; 58:942-950. DOI 10.1007/s00103-015-2200-z

Owen CG, Martin RM, Whincup PH, Smith GD, Cook DG. Does breastfeeding influence risk of type 2 diabetes in later life? A quantitative analysis of published evidence [published correction appears in *Am J Clin Nutr*. 2012 Mar;95(3):779]. *Am J Clin Nutr*. 2006;84(5):1043-1054. doi:10.1093/ajcn/84.5.1043

Panahi F, Rashidi Fakari F, Nazarpour S, Lotfi R, Rahimizadeh M, Nasiri M, Simbar M. Educating fathers to improve exclusive breastfeeding practices: a randomized controlled trial. *BMC Health*

Serv Res. 2022 Apr 26;22(1):554. doi: 10.1186/s12913-022-07966-8. PMID: 35468827; PMCID: PMC9040207.

Pérez-Escamilla R, Curry L, Minhas D, Taylor L, Bradley E. Scaling up of breastfeeding promotion programs in low- and middle-income countries: the "breastfeeding gear" model. *Adv Nutr.* 2012;3(6):790-800. doi:10.3945/an.112.002873

Pfahl S, Unrau E. Erfahrungen mit dem Mutterschutz am Arbeitsplatz. Befragung zu den Arbeitsbedingungen schwangerer und stillender Arbeitnehmerinnen. Berlin 2022. URL: <https://frauen.dgb.de/themen/++co++b7941256-e649-11ec-b8e3-001a4a160123> (Zugriff: 09.05.2023).

Robert E, Coppieters Y, Swennen B, Dramaix M. The Reasons for Early Weaning, Perceived Insufficient Breast Milk, and Maternal Dissatisfaction: Comparative Studies in Two Belgian Regions. *Int Sch Res Notices.* 2014;2014:678564. doi:10.1155/2014/678564

Robert Koch Institut. Gesundheitliche Lage der Frauen in Deutschland. Berlin 2020.

Rollins NC, Bhandari N, Hajeebhoy N, Horton S, Lutter CK, Martines JC, Piwoz EG, Richter LM, Victora CG; Lancet Breastfeeding Series Group. Why invest, and what it will take to improve breastfeeding practices? *Lancet.* 2016;387(10017):491-504. doi: 10.1016/S0140-6736(15)01044-2. PMID: 26869576.

Rose L, Seehaus R, Tolasch E. Stillen als mütterliche Aufgabe. *Ethnografische Einblicke in die Praxis der Stillberatung auf einer Geburtshilfestation.* *Gender* 2017;2: 46-61. <https://doi.org/10.3224/gender.v9i2.04>

Rubio-Gozalbo ME, Haskovic M, Bosch AM, et al. The natural history of classic galactosemia: lessons from the GalNet registry. *Orphanet J Rare Dis.* 2019;14(1):86. doi:10.1186/s13023-019-1047-z

Stordal B. Breastfeeding reduces the risk of breast cancer: A call for action in high-income countries with low rates of breastfeeding. *Cancer Med.* 2023;12(4):4616-4625. doi:10.1002/cam4.5288

Su D, Pasalich M, Lee AH, Binns CW. Ovarian cancer risk is reduced by prolonged lactation: a case-control study in southern China. *Am J Clin Nutr.* 2013;97(2):354-359. doi:10.3945/ajcn.112.044719

Theurich MA, Weikert C, Abraham K, Koletzko B. Stillquoten und Stillförderung in ausgewählten Ländern Europas. *Bundesgesundheitsbl* 2018;61: 926–936. <https://doi.org/10.1007/s00103-018-2762-7>

Toledo C, Cianelli R, Villegas Rodriguez N, et al. The significance of breastfeeding practices on postpartum depression risk. *Public Health Nurs.* 2022;39(1):15-23. doi:10.1111/phn.12969

United Nations. Breastfeeding 'for a healthier planet'. 01.08.2020. URL: <https://news.un.org/en/story/2020/08/1069372> (Zugriff: 10.05.2023).

Von der Lippe E, Brettschneider AK, Gutsche J, Poethko-Müller C, KiGGS Study Group. Einflussfaktoren auf Verbreitung und Dauer des Stillens in Deutschland. Ergebnisse der KiGGS-Studie – Erste Folgebefragung (KiGGS Welle 1). *Bundesgesundheitsbl* 2014;57: 849–859. DOI 10.1007/s00103-014-1985-5

Wang L, Collins C, Ratliff M, Xie B, Wang Y. Breastfeeding Reduces Childhood Obesity Risks. *Child Obes.* 2017;13(3):197-204. doi:10.1089/chi.2016.0210

Ware JL, Chen A, Morrow AL, Kmet J. Associations Between Breastfeeding Initiation and Infant Mortality in an Urban Population. *Breastfeed Med.* 2019;14(7):465-474. doi:10.1089/bfm.2019.0067

Wolter I. Wie entstehen Geschlechtsstereotype und wie wirken sie sich aus? *BPJM AKTUELL* 2020;2: 4-9.

Zhou Y, Chen J, Li Q, Huang W, Lan H, Jiang H. Association between breastfeeding and breast cancer risk: evidence from a meta-analysis [published correction appears in Breastfeed Med. 2015 Jun;10(5):288]. Breastfeed Med. 2015;10(3):175-182. doi:10.1089/bfm.2014.0141

Zong X, Wu H, Zhao M, Magnussen CG, Xi B. Global prevalence of WHO infant feeding practices in 57 LMICs in 2010-2018 and time trends since 2000 for 44 LMICs. EClinicalMedicine. 2021;37:100971. doi:10.1016/j.eclinm.2021.100971
